# Supplementary material for: Limited HIV-1 Reactivation in Resting CD4+ T cells from Aviremic Patients under Protease Inhibitors
Source: PubMed Central journal article supplement (PMC5138822; doi:10.1038/srep38313), 2016-12-06
Supplement: srep38313-s1.pdf [file srep38313-s1.pdf]

## Limited HIV-1 Reactivation in Resting CD4<sup>+</sup> T cells from Aviremic Patients under Protease Inhibitors

Amit Kumar<sup>1+</sup>, Wasim Abbas<sup>1+</sup>, Sophie Bouchat<sup>2</sup>, Jean-Stéphane Gatot<sup>2,S</sup>, Sébastien Pasquereau<sup>1</sup>, Kabamba Kabeya<sup>3</sup>,  
Nathan Clumeck<sup>3</sup>, Stéphane De Wit<sup>3</sup>, Carine Van Lint<sup>2++\*</sup>, Georges Herbein<sup>1++\*</sup>

<sup>+</sup> AK and WA, <sup>++</sup> GH and CVL contributed equally to the work.

<sup>1</sup> Department of Virology, Pathogens & Inflammation Laboratory, University of Franche-Comté, COMUE Bourgogne Franche-Comté University, UPRES EA4266, SFR FED 4234, CHRU Besançon, Besançon, France, <sup>2</sup> Laboratory of Molecular Virology, IBMM, Université Libre de Bruxelles (ULB), Gosselies, Belgium, <sup>3</sup> Department of Infectious Diseases, CHU St-Pierre, ULB, Bruxelles, Belgium, <sup>S</sup> Present address: Service de Génétique, Centre Hospitalier Universitaire (CHU) de Liège, Domaine Universitaire du Sart-Tilman, B23, 4000 Liège, Belgium.

\* Correspondence to: Dr Georges Herbein, Department of Virology, University of Franche-Comté, CHRU Besançon, Hôpital Saint-Jacques, 2 place Saint-Jacques, F-25030 Besançon cedex, France Ph. +33 381 218 877; Fax + 33 381 665 695; E-mail: [georges.herbein@univ-fcomte.fr](mailto:georges.herbein@univ-fcomte.fr) Or Dr Carine Van Lint, Laboratory of Molecular Virology, Institut de Biologie et de Médecine Moléculaires (IBMM), Université Libre de Bruxelles (ULB), rue des Profs Jeener et Brachet 12, 6041 Gosselies, Belgium. Ph. +32 2650 98 07; Fax + 32 2650 98 00; E-mail: [cvlint@ulb.ac.be](mailto:cvlint@ulb.ac.be)

**Supplementary Table S1:** Biological and virological characteristics of HIV<sup>+</sup> patient group under PI-cART taking into account the last treatment administered (n=24).

| Patients                               | Age (years) | CD4+ Nadir (cells/microl) | CD4+ at initiation of treatment (cells/microl) | HIV RNA Zenith (copies/ml) | HIV RNA Zenith (log copies/ml) | First treatment | PI in the first treatment | Failure of treatment (number) | Always under PI | At least once under PI |
|----------------------------------------|-------------|---------------------------|------------------------------------------------|----------------------------|--------------------------------|-----------------|---------------------------|-------------------------------|-----------------|------------------------|
| <b>PI at the last treatment (n=24)</b> |             |                           |                                                |                            |                                |                 |                           |                               |                 |                        |
| WSH 229                                | 52          | 204                       | 391                                            | 100000                     | 5.00                           | D4T 3TC NFV     | X                         | 1                             | X               | X                      |
| WSH 231                                | 53          | 192                       | 248                                            | 123000                     | 5.09                           | D4T 3TC ATV     | X                         | 3                             | X               | X                      |
| WSH 232                                | 47          | 181                       | 181                                            | 100000                     | 5.00                           | AZT 3TC IDV     | X                         | 2                             | X               | X                      |
| WSH 233                                | 55          | 48                        | 48                                             | 41800                      | 4.62                           | AZT 3TC IDV     | X                         | 2                             | X               | X                      |
| WSH 235                                | 51          | 339                       | 383                                            | /                          | /                              | AZT DDC         | 0                         | 4                             | 0               | X                      |
| WSH 236                                | 43          | 153                       | 226                                            | 285237                     | 5.46                           | AZT DDI         | 0                         | 9                             | 0               | X                      |
| WSH 238                                | 46          | 749                       | 749                                            | 100000                     | 5.00                           | TDF FTC LPV     | X                         | 2                             | X               | X                      |
| WSH 239                                | 34          | 370                       | 480                                            | 23871                      | 4.38                           | 3TC ABC NFV     | X                         | 5                             | 0               | X                      |
| WSH 240                                | 41          | 568                       | 568                                            | /                          | /                              | AZT 3TC         | 0                         | 4                             | 0               | X                      |
| WSH 241                                | 37          | 339                       | 385                                            | 789                        | 2.90                           | 3TC TDF fAPV    | X                         | 1                             | X               | X                      |
| B9                                     | 54          | 284                       | 342                                            | 58000                      | 4.76                           | 3TC TDF ATV     | X                         | 0                             | X               | X                      |
| B13                                    | 93          | 391                       | 424                                            | 115943                     | 5.06                           | AZT 3TC fAPV    | X                         | 0                             | X               | X                      |
| B15                                    | 49          | 735                       | 800                                            | 11000                      | 4.04                           | 3TC NVP LPV     | X                         | 0                             | X               | X                      |
| B27                                    | 51          | 312                       | 397                                            | 6641                       | 3.82                           | TDF FTC ATV     | X                         | 0                             | X               | X                      |
| B33                                    | 50          | 118                       | 341                                            | 74600                      | 4.87                           | AZT 3TC EFV     | 0                         | 4                             | 0               | X                      |
| B34                                    | 34          | 3                         | 3                                              | 333071                     | 5.52                           | TDF FTC DRV     | X                         | 0                             | X               | X                      |
| B38                                    | 52          | 257                       | 399                                            | 94000                      | 4.97                           | TDF LPV 3TC     | X                         | 2                             | X               | X                      |
| B39                                    | 22          | 252                       | 500                                            | 36400                      | 4.56                           | ABC LPV 3TC     | X                         | 2                             | X               | X                      |
| B40                                    | 65          | 228                       | 269                                            | 270000                     | 5.43                           | AZT 3TC fAPV    | X                         | 1                             | X               | X                      |
| B41                                    | 47          | 370                       | 370                                            | 117370                     | 5.07                           | TDF FTC DRV     | X                         | 0                             | X               | X                      |
| B42                                    | 51          | 454                       | 454                                            | 9070                       | 3.96                           | TDF ABC LPV     | X                         | 1                             | X               | X                      |
| B43                                    | 51          | 258                       | 290                                            | 512000                     | 5.71                           | AZT 3TC ABC     | 0                         | 0                             | 0               | X                      |
| B45                                    | 39          | 460                       | 800                                            | 15000                      | 4.18                           | ABC TDF NVP     | 0                         | 0                             | 0               | X                      |
| B46                                    | 50          | 342                       | 342                                            | 7313                       | 3.86                           | ABC 3TC ATV     | X                         | 0                             | X               | X                      |
| <b>Mean</b>                            | <b>48.6</b> | <b>317</b>                | <b>391</b>                                     | <b>110687</b>              | <b>4.69</b>                    |                 |                           | <b>1.79</b>                   |                 |                        |
| <b>SD</b>                              | <b>12.7</b> | <b>180</b>                | <b>195</b>                                     | <b>126507</b>              | <b>0.66</b>                    |                 |                           | <b>2.14</b>                   |                 |                        |
| <b>Median</b>                          | <b>50.0</b> | <b>298</b>                | <b>384</b>                                     | <b>84300</b>               | <b>4.92</b>                    |                 |                           | <b>1.00</b>                   |                 |                        |
| <b>1st Quartile</b>                    | <b>42.5</b> | <b>201</b>                | <b>285</b>                                     | <b>17218</b>               | <b>4.23</b>                    |                 |                           | <b>0.00</b>                   |                 |                        |
| <b>3rd Quartile</b>                    | <b>52.0</b> | <b>375</b>                | <b>461</b>                                     | <b>117013</b>              | <b>5.07</b>                    |                 |                           | <b>2.25</b>                   |                 |                        |

ABC, abacavir; DDI, didanosine; 3TC, lamivudine; TDF, tenofovir; RPV, rilpivirine; AZT, zidovudine; D4T, stavudine; DDC, zalcitabine; FTC, emtricitabine; EFV, efavirenz; NVP, nevirapine; fAPV, fosamprenavir; IDV, indinavir; LPV, lopinavir; NFV, nelfinavir; RTV, ritonavir; SQV, saquinavir; DRV, darunavir

**Supplementary Table S2:** Biological and virological characteristics of HIV<sup>+</sup> patient groups under NNRTI-cART taking into account the last treatment administered (n=23).

| Patients                                  | Age (years)  | CD4+ Nadir (cells/microl) | CD4+ at initiation of treatment (cells/microl) | HIV RNA Zenith (copies/ml) | HIV RNA Zenith (log copies/ml) | First treatment | PI in the first treatment | Failure of treatment (number) | Always under PI | At least once under PI |
|-------------------------------------------|--------------|---------------------------|------------------------------------------------|----------------------------|--------------------------------|-----------------|---------------------------|-------------------------------|-----------------|------------------------|
| <b>NNRTI at the last treatment (n=23)</b> |              |                           |                                                |                            |                                |                 |                           |                               |                 |                        |
| WSH 227                                   | 64           | 247                       | 247                                            | 209000                     | 5.32                           | AZT 3TC NFV EFV | X                         | 8                             | 0               | X                      |
| WSH 228                                   | 50           | 300                       | 300                                            | 36000                      | 4.56                           | AZT 3TC NVP     | 0                         | 4                             | 0               | 0                      |
| WSH 230                                   | 34           | 375                       | 375                                            | /                          | /                              | AZT 3TC EFV     | 0                         | 5                             | 0               | X                      |
| WSH 242                                   | 42           | 358                       | 619                                            | 10200                      | 4.01                           | AZT 3TC IDV     | X                         | 4                             | 0               | X                      |
| WSH 243                                   | 37           | 369                       | 592                                            | 100000                     | 5.00                           | 3TC DDI EFV     | 0                         | 2                             | 0               | 0                      |
| WSH 244                                   | 42           | 148                       | 133                                            | 750000                     | 5.88                           | AZT 3TC NFV     | X                         | 5                             | 0               | X                      |
| WSH 245                                   | 51           | 170                       | 170                                            | 81193                      | 4.91                           | D4T 3TC IDV     | X                         | 4                             | 0               | X                      |
| WSH 246                                   | 52           | 244                       | 264                                            | 50200                      | 4.70                           | TDF FTC EFV     | 0                         | 2                             | 0               | 0                      |
| WSH 247                                   | 64           | 204                       | 349                                            | 23272                      | 4.37                           | AZT SQV         | X                         | 8                             | 0               | X                      |
| WSH 248                                   | 45           | 555                       | 555                                            | /                          | /                              | 3TC ABC         | 0                         | 2                             | 0               | 0                      |
| WSH 249                                   | 44           | 46                        | 56                                             | 750000                     | 5.88                           | D4T DDI IDV     | X                         | 2                             | 0               | X                      |
| B2                                        | 27           | 292                       | 344                                            | 37187                      | 4.57                           | TDF FTC LPV     | X                         | 0                             | 0               | X                      |
| B3                                        | 50           | 332                       | 332                                            | 106000                     | 5.03                           | TDF FTC APV     | X                         | 0                             | 0               | X                      |
| B6                                        | 60           | 360                       | 360                                            | 21000                      | 4.32                           | AZT 3TC ABC TDF | 0                         | 0                             | 0               | X                      |
| B8                                        | 39           | 975                       | 1000                                           | /                          | /                              | EFV FTC TDF     | 0                         | 0                             | 0               | 0                      |
| B10                                       | 66           | 550                       | 623                                            | /                          | /                              | AZT 3TC ABC     | 0                         | 0                             | 0               | X                      |
| B14                                       | 29           | 249                       | 265                                            | 2072                       | 3.32                           | TDF FTC LPV     | X                         | 0                             | 0               | X                      |
| B16                                       | 53           | 530                       | 697                                            | 82000                      | 4.91                           | 3TC TDF NVP     | 0                         | 0                             | 0               | 0                      |
| B18                                       | 40           | 70                        | 70                                             | 287432                     | 5.46                           | TDF FTC DRV     | X                         | 0                             | 0               | X                      |
| B21                                       | 54           | 343                       | 343                                            | 68000                      | 4.83                           | ABC TDF NVP     | 0                         | 0                             | 0               | 0                      |
| B22                                       | 40           | 463                       | 463                                            | 194192                     | 5.29                           | TDF FTC fAPV    | X                         | 0                             | 0               | X                      |
| B29                                       | 34           | 333                       | 410                                            | 11500                      | 4.06                           | AZT 3TC fAPV    | X                         | 0                             | 0               | X                      |
| B37                                       | 46           | 607                       | 607                                            | 40900                      | 4.61                           | AZT 3TC ABC     | 0                         | 1                             | 0               | X                      |
| <b>Mean</b>                               | <b>46.2</b>  | <b>353</b>                | <b>399</b>                                     | <b>150534</b>              | <b>4.79</b>                    |                 |                           | <b>2.04</b>                   |                 |                        |
| <b>SD</b>                                 | <b>10.7</b>  | <b>197</b>                | <b>218</b>                                     | <b>218335</b>              | <b>0.62</b>                    |                 |                           | <b>2.53</b>                   |                 |                        |
| <b>Median</b>                             | <b>45.0</b>  | <b>333</b>                | <b>349</b>                                     | <b>68000</b>               | <b>4.83</b>                    |                 |                           | <b>1.00</b>                   |                 |                        |
| <b>1st Quartile</b>                       | <b>39.5</b>  | <b>246</b>                | <b>265</b>                                     | <b>29636</b>               | <b>4.47</b>                    |                 |                           | <b>0.00</b>                   |                 |                        |
| <b>3rd Quartile</b>                       | <b>52.5</b>  | <b>419</b>                | <b>574</b>                                     | <b>150096</b>              | <b>5.16</b>                    |                 |                           | <b>4.00</b>                   |                 |                        |
| <b>MW p-value</b>                         | <b>0.495</b> | <b>0.579</b>              | <b>0.903</b>                                   | <b>0.892</b>               | <b>0.892</b>                   |                 |                           | <b>0.985</b>                  |                 |                        |

ABC, abacavir; DDI, didanosine; 3TC, lamivudine; TDF, tenofovir; RPV, rilpivirine; AZT, zidovudine; D4T, stavudine; DDC, zalcitabine; FTC, emtricitabine; EFV, efavirenz; NVP, nevirapine; fAPV, fosamprenavir; IDV, indinavir; LPV, lopinavir; NFV, nelfinavir; RTV, ritonavir; SQV, saquinavir; DRV, darunavir
